# Supplementary material
Source: Research Square preprint supplement (doi:10.21203/rs.3.rs-9182169/v1)
Supplement: Supplementary file 1 [file 43838222aa9d6a74f927b1c6.docx]

**
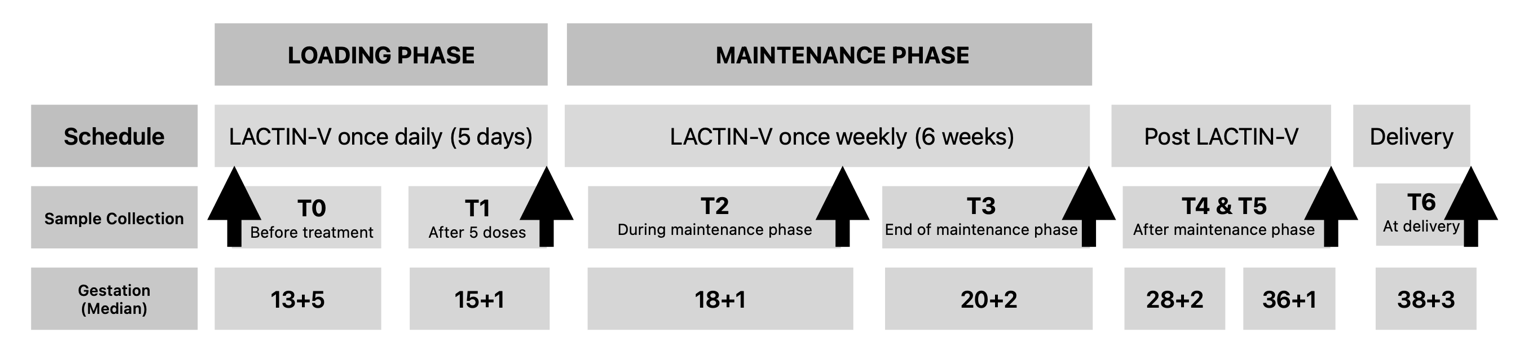
**

**Extended Data Figure 1**

**Flow chart of the FLIP-1 schedule of events and study procedures**

LACTIN-V administration schedule of loading dose, once daily for five days, and weekly for six weeks as maintenance phase. Samples were collected longitudinally at Timepoint 0 (T0) median gestational age 13+5 (IQR 13+0-14+4), and at 6 subsequent longitudinal timepoints; T1 (Median GA 15+1 [IQR 14+3-16+1]), T2 (18+1 [17+1-18+6]), T3 (20+2 [19+2-20+6]), T4 (28+2 [27+5-29+4]), T5 (36+1 [34+6-36+3]), and T6 (at delivery (38+3 [37+4-39+2].


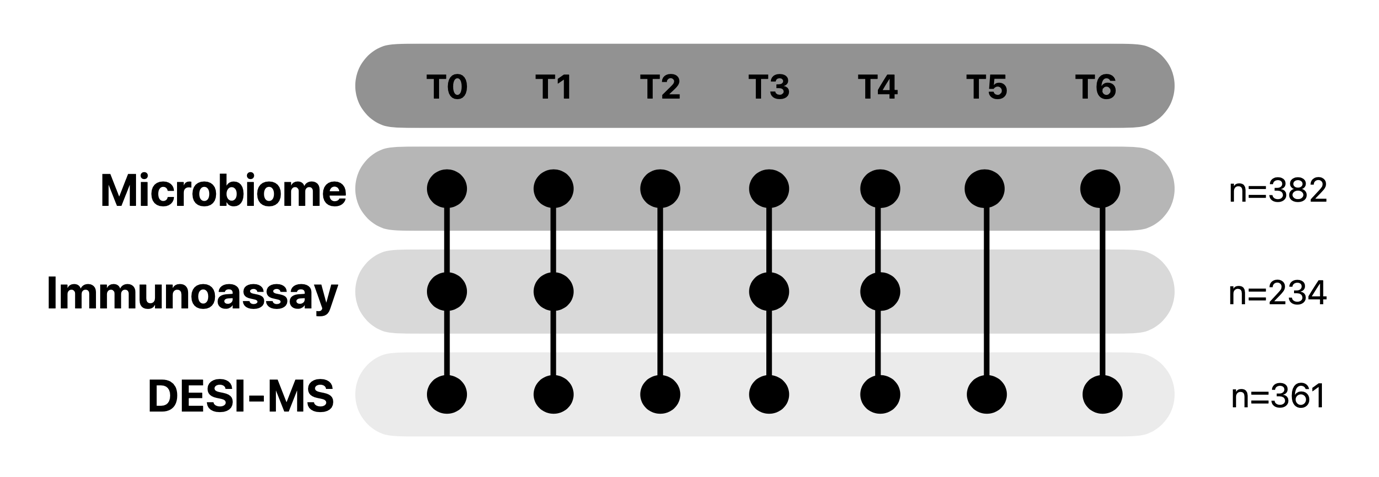


**Extended Data Figure 2**

**Graphic representation of the participant clinical samples analysed in the FLIP-1 study**

Samples were analysed for microbial composition (n=382), immune mediator analyses (n=234) and metabolic profiles using DESI-MS (n=361).


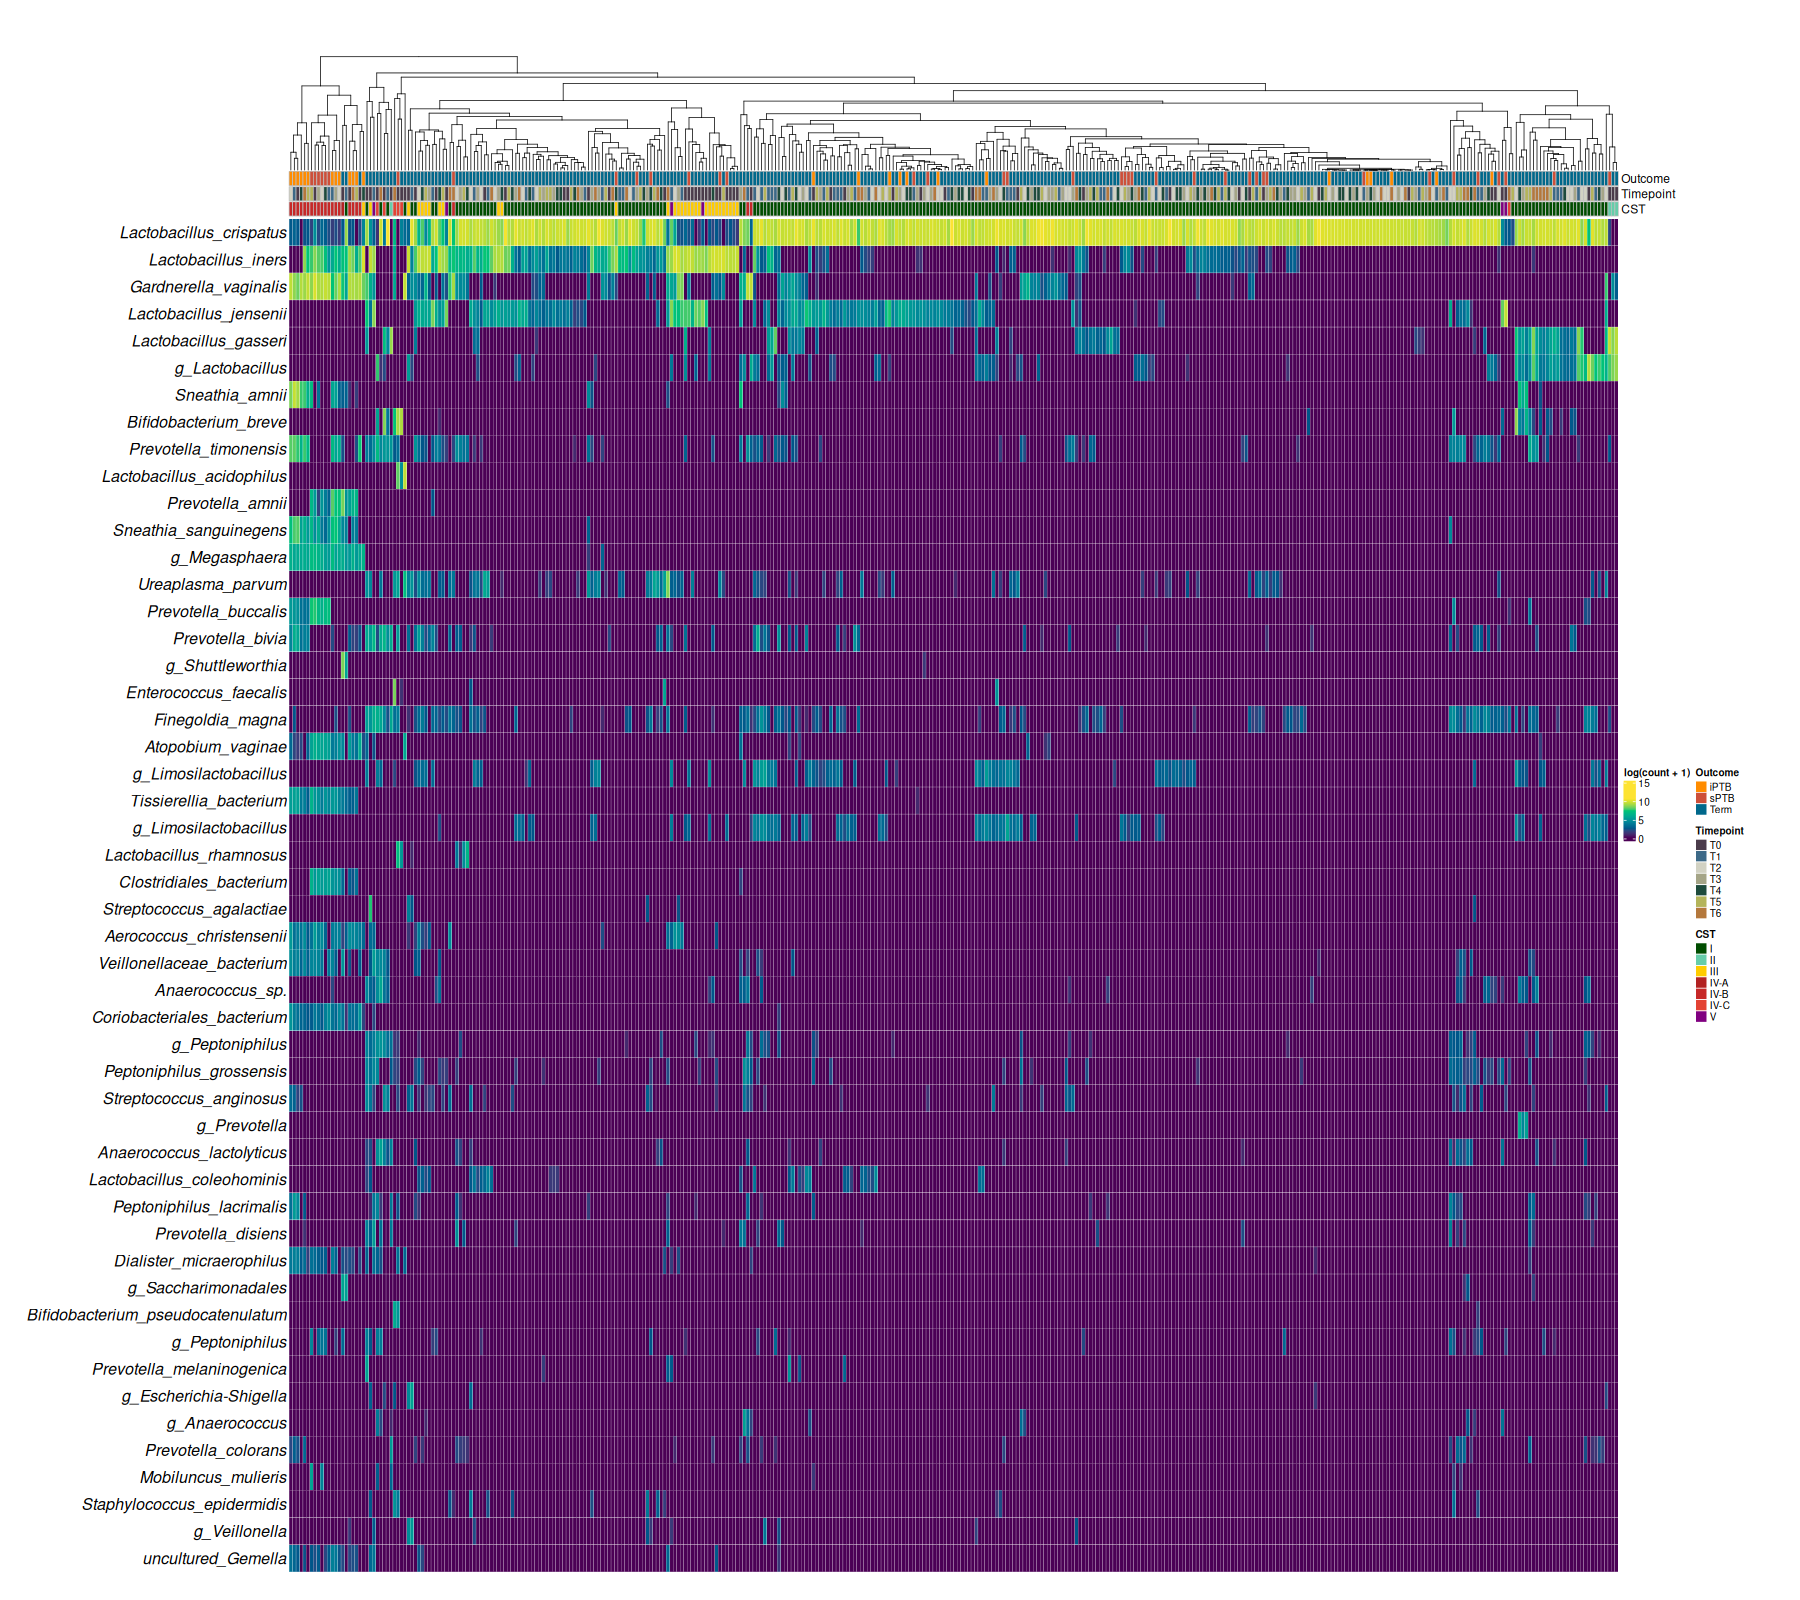


**Extended Data Figure 3**

**Heatmap showing Log-transformed relative abundance values of microbial taxa analysed using hierarchical clustering.**

Log-transformed relative abundance of microbial taxa across individual samples from the FLIP-1 study are presented. Individual samples are colour coded by their timepoint, assigned VALENCIA CST and pregnancy outcome. Hierarchical clustering was performed using complete linkage and Euclidean distance.

**Extended Data Table 1. Gestational age at delivery for participants enrolled in the VMET‑2 and FLIP‑1 studies between September 2019 and September 2020.**

Numbers and percentages are presented.

| Outcome | VMET-2  N=262  (n,%) | FLIP-1  N=61  (n,%) | P value |
| --- | --- | --- | --- |
| Term | 211 (80.5) | 49 (80.3) | ns |
| sPTB 36+6-34+0 | 16 (6.1) | 3 (4.9) |
| sPTB <33+6-24+0 | 22 (8.4) | 2 (3.3) |
| sPTB/MTL <23+6-16+0 | 4 (1.5) | 1 (1.6) |
| iPTB <37+0 | 9 (3.4) | 5 (8.2) |
| Miscarriage < 16+0 | 0 (0) | 1 (1.6) |

**Extended Data Table 2. Immune analyte concentrations for the matched VMET-2 (n=53) and FLIP-1 (n=54) cohorts.**

Median values and interquartile ranges are presented. Statistical significance was assessed using the paired Wilcoxon signed‑rank test two tailed.

| Immune analyte pg/ml  Median [IQR] | **TA**  **VMET-2** | **TB**  **VMET-2** | **P value** | **T0**  **FLIP-1** | **T3**  **FLIP-1** | **P value** |
| --- | --- | --- | --- | --- | --- | --- |
| **IL-1β** | 23.93 [8.527-83.57] | 37.58 [6.978 – 112.2] | 0.615 | 14.56 [0.5720 – 69.35] | 10.06 [0.8665 – 41.94] | 0.087 |
| **IL-6** | 0.8500 [0.07778-0.8500] | 0.8500 [0.8500 – 0.8500] | 0.877 | 0.8500 [0.1843 – 0.8500] | 0.8500 [0.03353 – 0.8500] | 0.286 |
| **IL-8** | 537.5 [179.1-1481] | 680 [247.1 – 1750] | 0.848 | 447.9 [134.9 – 1488] | 462.5 [117.4 – 1829] | 0.993 |
| **C1q** | 0.03946 [0.03350 – 0.1966] | 0.3350 [0.3350 – 0.1222] | 0.914 | 0.1676 [0.0335 – 0.6347] | 0.09642 [0.0335 – 0.2162] | 0.084 |
| **C2** | 22.72 [5.337 – 157.7] | 19.26 [7.741 – 427.2] | 0.030 | 7.773 [3.272 – 25.77] | 7.7158 [4.129 – 17.91] | 0.541 |
| **C3** | 0.1100 [0.1100 – 0.1100] | 0.1100 [0.1100 – 0.1100] | 0.755 | 0.1100 [0.1100 – 0.1100] | 0.1100 [0.1100 – 0.1100] | 0.529 |
| **C3a** | 219/6 [117.8 – 624.2] | 273.2 [153.8 – 621.3] | 0.357 | 147.7 [83.85 – 271.8] | 109.8 [31.38 – 186.4] | 0.017 |
| **C3b/iC3b** | 2.388 [2.388 – 5.268] | 2.388 [2.388 – 17.45] | 0.116 | 5.613 [2.477 – 35.59] | 2.75 [2.290 – 8.415] | 0.014 |
| **C4** | 3.415 [1.207 – 22.04] | 7.328 [1.527 – 25.29] | 0.259 | 9.903 [4.321 – 68.96] | 1.907 [0.4479 – 12.03] | 0.001 |
| **C4b** | 0.4689 [0.1650 – 1.384] | 0.6269 [0.1650 – 2.752] | 0.378 | 0.3122 [0.1650 – 1.370] | 0.5006 [1.650 – 1.195] | 0.909 |
| **C5** | 2.005 [0.400 – 10.33] | 2.005 [0.8091 – 12.73] | 0.278 | 2.516 [0.400 – 4.116] | 2.650 [0.400 – 2.701] | 0.375 |
| **C5a** | 40.19 [8.316 – 79.17] | 40.24 [15.01 – 104.0] | 0.056 | 19.00 [5.925 – 37.94] | 17.04 [10.81 – 30.04] | 0.547 |
| **Factor D** | 0.1555 [0.01350 – 0.5372] | 0.1429 [0.03153 – 0.5829] | 0.030 | 0.03196 [0.1350 – 0.1146] | 0.1350 [0.1350 – 0.03038] | 0.00043 |
| **Factor H** | 9.046 [4.225 – 39.95] | 13.69 [6.760 – 38.98] | 0.242 | 13.12 [6.472 – 80.84] | 6.919 [2.780 – 35.92] | 0.008 |
| **Factor I** | 0.2228 [0.900 – 2.815] | 1.296 [0.900 – 3.615] | 0.041 | 0.1516 [0.09 – 0.7274] | 0.09 [0.09 – 0.1571] | 0.011 |
| **MBL** | 0.3260 [0.07263 – 0.8709] | 0.4776 [0.1519 – 1.238] | 0.203 | 0.2291 [0.05011 – 0.5705] | 0.1546 [0.05634 – 0.5168] | 0.447 |
| **MMP-2** | 643.1 [54.00 – 2553] | 994.9 [54.00 – 2560] | 1.000 | 508.5 [54 – 2293] | 648.1 [178.5 – 1570] | 0.992 |
| **MMP-8** | 3737 [1109 – 29101] | 5823 [1508 – 23144] | 0.427 | 3362 [884.8 – 11050] | 2298 [821.3 – 7081] | 0.449 |
| **MMP-9** | 22321 [4792 – 48238] | 26239 [10653 – 72308] | 0.237 | 31541 [6797 – 52047] | 22714 [5189 – 44442] | 0.194 |
